# Supplementary material for: Planktic foraminiferal shell thinning in the Arabian Sea due to anthropogenic ocean acidification?
Source: Copernicus journal article supplement (doi:10.5194/bg-6-1917-2009), 2009-09-23
Supplement: Supplementary file 1 [file SI_Data_supplement.xls]

## Sheet: Shell_Weights_CoreTop
	Shells weights from the core top of BC21WP7
	Measured Weights
		Category	Fraction (um)	Number	Relative # (%)	Mass (mg)	Mass/Foram (ug)	Total
	Thin	1	250-500	795	100	8.01	10.0755	10.0755
	Relatively	2	250-300	298	67.1171	2.873	9.64094	11.5045
	Thin		300-355	100	22.5225	1.38	13.8
			355-400	41	9.23423	0.73	17.8049
			400-500	5	1.12613	0.125	25
	Relatively	3	250-300	391	66.0473	4.212	10.7724	12.8666
	Thick		300-355	138	23.3108	2.143	15.529
			355-400	54	9.12162	1.044	19.3333
			400-500	9	1.52027	0.218	24.2222
	Thick	4	250-500	657	100	8.82	13.4247	13.4247
	Recalculating 250-355 fraction weight of category 1 and 4 using distributions of category 2 and 3
			mass %	#			mass	#
	relatively thin	250-300	56.2451	67.1171	relatively thick	250-300	55.2974	66.0473
		300-355	27.0164	22.5225		300-355	28.1344	23.3108
		355-400	14.2913	9.23423		355-400	13.7062	9.12162
		400-500	2.44714	1.12613		400-500	2.86202	1.52027
			mass %	#
	Average	250-300	55.7712	66.5822
		300-355	27.5754	22.9167
		355-400	13.9987	9.17793
		400-500	2.65458	1.3232
			Total mass (mg)	mass/foram			Total mass (mg)	mass/foram
	Thin (1)	250-300	4.46728	8.43951	Thick (4)	250-300	4.91902	11.2449
		300-355	2.20879	12.1237		300-355	2.43215	16.1538
		355-400	1.1213	15.3677		355-400	1.23469	20.4761
		400-500	0.212632	20.2133		400-500	0.234134	26.9323
	Thin (1)	250-355		9.65845	Thick (4)	250-355		12.869

## Sheet: Wall_Thickness_CoreTop
	Wall thicknesses of thick and thin shells from the core top of BC21WP7
			Wall Thickness
	Photo name	Length in Corel			Real length
			Shell = y (mm)		Shell = z (um)
		10 um = x (mm)	min	max	min	max	avg
	01-BC21WP7-dun-01a.tif	43.6	67.54	79.99	15.4908	18.3463	16.9186
	01-BC21WP7-dun-02a.tif	43.69	22.45	37.5	5.13848	8.5832	6.86084
	01-BC21WP7-dun-02d.tif	43.67	49.59	66.59	11.3556	15.2485	13.302
	01-BC21WP7-dun-02e.tif	43.68	51.52	64.32	11.7949	14.7253	13.2601
	01-BC21WP7-dun-03a.tif	43.57	41.45	65.98	9.51343	15.1434	12.3284
	01-BC21WP7-dun-04a.tif	43.64	29.33	41.03	6.7209	9.40192	8.06141
	01-BC21WP7-dun-04d.tif	61.19	40.65	60.71	6.64324	9.92156	8.2824
	THIN					Avg	12.0255	3.3738
	01-BC21WP7-dik-01a.tif	43.7	55.87	67.53	12.7849	15.4531	14.119
	01-BC21WP7-dik-02a.tif	43.6	74.65	111.81	17.1216	25.6445	21.383
	01-BC21WP7-dik-02b.tif	43.65	48.07	107.68	11.0126	24.669	17.8408
	01-BC21WP7-dik-03a.tif	43.66	52.56	59.09	12.0385	13.5341	12.7863
	01-BC21WP7-dik-03d.tif	43.66	63.45	69.94	14.5328	16.0192	15.276
	01-BC21WP7-dik-04b.tif	43.58	66.38	76.74	15.2318	17.609	16.4204
	01-BC21WP7-dik-04c.tif	43.62	63.01	92.9	14.4452	21.2976	17.8714
	01-BC21WP7-dik-05b.tif	26.88	50.32	77.4	18.7202	28.7946	23.7574
	THICK					Avg	17.4318	3.66864
							31.014	% reduction in wall thickness

## Sheet: Stable_Isotopes_CoreTop
	Stable isotope measurements from the core top of BC21WP7
		Single Specimen Stable Isotopes Measurements top cm or BC21WP7
		Thin G. Ruber - Category 2 (relative thin)														Thick G. Ruber - Category 3 (relative thick)																mass %	mass % 250-400 um	mass % 250-355 um
		250-300 um			300-355 um			355-400 um			400-500 um					250-300 um			300-355 um			355-400 um			400-500 um					Average	250-300	55.7712	0.572921	0.669148
		V	18O	13C	V	18O	13C	V	18O	13C	V	18O	13C			V	18O	13C	V	18O	13C	V	18O	13C	V	18O	13C				300-355	27.5754	0.283274	0.330852
	1	1.34	-0.97	0.95	1.363	-1.872	0.533	2.179	-2.384	1.389	2.4	-2.182	0.334		1	1.1	-1.55	0.22	1.731	-2.057	1.06	1.921	-2.306	0.98	0.982	-0.927	1.429				355-400	13.9987	0.143805
	2	1.4	-1.54	0.7	2.084	-3.037	0.407	1.929	-2.374	0.627	1.079	-1.747	1.162		2	1.2	-2.15	0.57	1.678	-1.901	1.255	2.541	-2.689	1.317	2.659	-2.145	0.507				400-500	2.65458
	3	1.2	-1.37	0.42	1.921	-2.653	1.187	1.747	-1.543	0.544	1.079	-1.571	1.93		3	2.2	-2.28	0.58	1.084	-1.34	1.695	1.888	-2.107	0.901	2.225	-1.688	1.843
	4	0.84	-1.09	0.09	1.845	-1.607	0.155	1.644	-1.635	0.332	0.844	-1.661	0.855		4	2.08	-1.99	0.69	2.122	-1.536	1.153	2.6	-2.062	0.871	0.928	-2.158	0.636				d13C				d18O
	5	1	-1.02	0.41	1.948	-2.37	1.177	2.055	-2.16	1.021					5	0.97	-1.76	0.77	1.648	-2.041	1.175	1.853	-1.943	0.844	2.776	-1.985	1.225				250-300	300-355	355-400		250-300	300-355	355-400
	6	0.81	-2	0.44	0.998	-1.779	0.086	2.022	-1.979	0.65					6	1.33	-2.88	0.63	1.771	-2.239	0.752	1.509	-1.804	0.94						Thin - mean	0.45	0.380875	0.758813	1.07025	-1.60469	-2.00859	-2.02125	-1.79025
	7	0.71	-1.86	0.36	2.342	-2.157	1.385	1.667	-1.414	0.673					7	1.39	-2.75	1.16	1.669	-2.246	0.58	2.502	-2.36	1.706						Thick - mean	0.669231	0.998828	1.10842	1.128	-1.91769	-2.06231	-2.09975	-1.7806
	8	1.3	-1.97	0.72	1.669	-2.323	-0.515	1.899	-2.713	0.762					8	1.5	-1.78	0.4	2.367	-2.226	1.484	2.411	-2.411	0.471						Thin - SD	0.297083	0.467546	0.410963	0.667329	0.768614	0.477615	0.407616	0.270872
	9	1.6	-2.55	0.76	1.377	-1.786	0.355	1.514	-2.286	1.334					9	1.1	-1.85	0.66	1.117	-2.42	1.273	2.242	-2.139	1.285						Thick - SD	0.27386	0.435005	0.334895	0.556538	0.377553	0.453779	0.346542	0.513372
	10	1.1	-2.11	0.43	1.238	-1.644	0.366	1.396	-2.345	-0.015					10	0.96	-1.95	0.64	1.008	-1.049	1.055	2.486	-2.157	1.474
	11	0.9	-1.83	0.43	1.486	-1.439	0.267	2.396	-1.306	0.607					11	1.3	-1.34	0.99	1.472	-2.907	0.715	1.365	-1.899	1.302						250-400	d13C		d18O
	12	1.1	-2.16	0.9	1.453	-1.901	0.275	2.087	-2.075	0.678					12	1.2	-2.05	0.67	2.005	-2.698	1.206	0.929	-1.32	1.21							Mean	SD	Mean	SD	N
	13	0.8	-2.43	0.54	1.316	-2.011	-0.531	1.884	-2.059	0.386					13	1.1	-1.95	0.7	1.481	-2.499	0.897									Thick	0.825754	0.328285	-1.98484	0.394686	67
	14	1	1.68	0.58	0.905	-2.44	0.086	2.355	-2.297	1.432					14	1.4	-1.71	0.15	1.331	-2.016	0.67									Thin	0.474827	0.361747	-1.77901	0.634268	80
	15	0.7	-1.77	0.14	1.612	-2.602	-0.24	2.26	-1.58	1.2					15	1.6	-1.55	0.4	2.018	-2.042	1.173
	16	0.7	-2.29	0.16	1.477	-1.826	1.052	2.094	-2.19	0.521					16	1.5	-2.09	1.02	1.766	-2.101	1.48									250-355	d13C		d18O
	17	1.2	-1.1	0.19	1.523	-1.304	0.627								17	1.5	-1.42	0.43	1.167	-1.738	0.491										Mean	SD	Mean	SD	N
	18	1	-1.64	0.43	1.695	-2.14	0.601								18	1.2	-1.79	0.52	1.458	-2.209	0.872									Thick	0.778279	0.327175	-1.96554	0.402773	55
	19	1.2	-1.74	0.69	1.863	-2.41	0.848								19	1.7	-1.97	1.23	1.292	-1.628	0.253									Thin	0.42713	0.353481	-1.73832	0.672336	64
	20	0.8	-1.33	0.55	0.811	-2.154	0.108								20	1.7	-1.71	0.94	1.426	-2.055	0.733
	21	1.4	-1.74	0.55	1.836	-1.772	0.065								21	1.38	-1.89	0.67	1.39	-2.477	1.188
	22	1.1	-1.47	0.64	1.644	-1.797	0.252								22	0.9	-2.54	0.9	0.969	-1.68	0.545
	23	0.8	-2.61	-0.53	1.057	-2.736	-0.216								23	0.8	-1.66	0.6	1.603	-2.666	0.903
	24	0.9	-1.63	0.18	2.019	-2.679	0.651								24	1.2	-1.53	0.7	1.396	-1.868	0.676
	25	1.2	-1.78	0.51	1.432	-1.908	0.913								25	1.2	-1.65	0.91	2.41	-1.788	0.975
	26	1.4	-2.28	0.55	1.32	-1.467	0.268								26	1.4	-2.07	0.25	0.647	-2.363	1.457
	27	1.2	-1.84	0.01	1.564	-1.88	0.196								27				0.695	-2.889	1.037
	28	1.1	-1.94	0.38	1.061	-1.611	0.192								28				0.872	-1.556	2.142
	29	0.9	-1.09	0.87	1.345	-1.149	0.01								29				0.719	-1.572	0.071
	30	0.9	-0.56	0.51	1.188	-1.156	0.185
	31	0.9	-1.65	0.2	0.691	-2.551	0.622
	32	1.25	-1.67	0.64	0.646	-2.114	0.821
		1.05469	-1.60469	0.45	1.46028	-2.00859	0.380875	1.9455	-2.02125	0.758813	1.3505	-1.79025	1.07025			1.34269	-1.91769	0.669231	1.45903	-2.06231	0.998828	2.02058	-2.09975	1.10842	1.914	-1.7806	1.128
		0.237473	0.768614	0.297083	0.412164	0.477615	0.467546	0.292827	0.407616	0.410963	0.708382	0.270872	0.667329			0.331114	0.377553	0.27386	0.469401	0.453779	0.435005	0.53894	0.346542	0.334895	0.89939	0.513372	0.556538
					Discarded data (voltage too low)														Discarded data (voltage too low)
					300-355 um			355-400 um											300-355 um			355-400 um
					V	18O	13C	V	18O	13C									V	18O	13C	V	18O	13C
					0.162	-12.509	-3.604	0.274	-8.515	-3.201									0.3	-7.496	-1.135	0.236	-6.736	-1.268
					0.518	-3.511	-0.51	0.522	-2.865	1.192									0.399	-5.695	-1.239	0.487	-5.492	0.194
					0.33	-7.695	-1.51												0.37	-7	-1.636	0.251	-9.196	-3.233
					0.54	-5.54	-1.287												0.418	-5.281	-0.594	0.334	-7.234	-1.37
					0.254	-10.18	-2.721												0.257	-8.975	-3.07	0.151	-11.757	-3.719
					0.207	-11.873	-4.58												0.408	-5.872	-0.563	0.442	-5.544	-0.723
					0.532	-4.953	-1.113												0.374	-7.389	-1.712
					0.211	-10.224	-2.627												0.232	-10.816	-2.635
					0.362	-6.213	-1.823												0.347	-6.804	-1.278
					0.415	-5.87	-1.353												0.31	-7.567	-1.235
																			0.631	-3.976	0.572
																			0.58	-0.773	1.738
																			0.524	-2.094	2.194

## Sheet: Radiocarbon_CoreTop
	Radiocarbon analysis result from Kiel
			Sample Description	Corrected pMC†	Conventional Age	d13C(‰)‡
	Thin (1)	KIA 29753	HB-824, BC21WP7, 0-1 cm , Holder: 30913	104.15 ± 0.31	-325 ± 25 BP	-2.47 ± 0.24
	Thick (4)	KIA 29755	HB-826, BC21WP7, 1-2 cm , Holder: 30889	98.34 ± 0.31	135 ± 25 BP	-1.29 ± 0.12
		N.B.	Both samples are from the top centimeter (0-1 cm), but to avoid confusion in the laboratory we labelled the sample with thick specimens as 1 centimeter lower (1-2 cm)
			All specimens in category 1 (795 shells) and 4 (657 shells) have been used to make up the two samples for the radiocarbon analysis

## Sheet: Shell_Weights_BoxCore
	Shells weights from sediment core 905B (and 905P for glacial sample)
	Measured Weights
			250 - 300 um					300 - 355 um								Ratio of amount of shells*
	Sample	Depth (cm)	# Forams	Measured	Weight Cup	Weight	Mass/Foram	# Forams	Measured	Weight Cup	Weight	Mass/Foram	250-355 weight			250-300	0.743945
	0 - 0.5	0.25	80	19.008	18.186	0.822	10.275	80	19.537	18.31	1.227	15.3375	11.5713	11.8244		300-355	0.256055
	0.5 - 1	0.75	80	19.1131	18.313	0.8001	10.0013	80	19.527	18.315	1.212	15.15	11.3196
	1 - 1.5	1.25	80	19.207	18.313	0.894	11.175	80	19.385	18.234	1.151	14.3875	11.9976			*see Shell_Weights_CoreTop tab
	1.5 - 2	1.75	80	19.206	18.31	0.896	11.2	80	19.497	18.299	1.198	14.975	12.1666
	2.5 - 3	2.75	80	19.185	18.314	0.871	10.8875	80	19.541	18.314	1.227	15.3375	12.0269
	6 - 6.5	6.25	80	19.133	18.312	0.821	10.2625	76	19.448	18.313	1.135	14.9342	11.4587
	9 - 9.5	9.25	80	19.198	18.312	0.886	11.075	80	19.556	18.314	1.242	15.525	12.2144
	13 - 13.5	13.25	80	19.103	18.238	0.865	10.8125	74	19.334	18.237	1.097	14.8243	11.8397
	17.5 - 18	17.75	80	19.173	18.237	0.936	11.7	80	19.503	18.239	1.264	15.8	12.7498	12.7026
	20 - 20.5	20.25	80	19.222	18.312	0.91	11.375	80	19.624	18.314	1.31	16.375	12.6553
	22.5 - 23	22.75	80	19.24	18.237	1.003	12.5375	80	19.626	18.236	1.39	17.375	13.7762	13.5575
	24.5 - 25	24.75	80	19.27	18.315	0.955	11.9375	80	19.668	18.314	1.354	16.925	13.2146
	26.5 - 27	26.75	80	19.301	18.314	0.987	12.3375	80	19.719	18.312	1.407	17.5875	13.6818
	LGM	409	80	19.38	18.312	1.068	13.35	59	19.419	18.258	1.161	19.678	14.9703

## Sheet: 210Pb_Activity_Boxcore
	Method
	210Pb activities in core 905 were determined indirectly using the granddaughter 210Po (van Weering et al., 1987) and evaluated with different 210Pb mixing models (Soetaert et al., 1996) given a 14C-AMS constrained sedimentation rate of 0.02 cm/yr and a constant dry bulk density.
	Results
	Best fits describing the 210Pb data (see figure) were obtained with model 4a (Soetaert et al., 1996) which solves 6 parameters and includes a bioturbation coefficient (Db) and non-local mixing. The non-local component is a surface flux injected into a layer with thickness 2dx, centered at a depth L. For core 905, the mixing parameter results of model 4a yield a 210Pb Db of 0.061 cm2/yr, and an in…
	References
	Soetaert, K., Herman, P.M.J., Middelburg, J.J., Heip, C., de Stigter, H.C., van Weering, T.C.E., Epping, E., Helder, W. (1996). Modeling 210Pb-derived mixing activity in ocean margin sediments: Diffusive versus non-local mixing. J. Mar. Res, 54, 1207-1227.
	Van Weering, T.C.E., Berger, G.W., Kalf, J. (1987). Recent sediment accumulation in the Skagerrak, northeast North Sea. Neth. J. Sea Res., 21, 177-189.

## Sheet: Shell_Weights_SurfaceWater
	Shells weights from surface water
	Shell weights from surface water
	sample	species	fraction	N	weight cup [mg]	cup+forams [mg]	weight per foram [µgram]		Mean of two repetitions
	sample 906-1-1 #1	G. ruber	250-355	10	18.341	18.454	11.3		11.35
	sample 906-1-1 #2	G. ruber	250-355	10	18.343	18.455	11.2		11.7
	sample 906-1-1 #3	G. ruber	250-355	10	18.34	18.453	11.3		10.9
	sample 906-1-1 #4	G. ruber	250-355	10	18.339	18.448	10.9		10.65
	sample 906-1-1 #5	G. ruber	250-355	10	18.341	18.467	12.6		12.55
	sample 906-1-1 #6	G. ruber	250-355	10	18.339	18.461	12.2		11.9
	average				18.3405		11.5833		11.5083
	s.d. Of sample means				0.00151658		0.661564		0.693842
	S.E.				0.000619139		0.270082		0.28326
	Population s.d. estimate:								2.19412
	95% conf. Interval on mean lower limit				18.3393		11.054		10.9531
	95% conf. Interval on mean upper limit				18.3417		12.1127		12.0635
	Repetition of measurements
	sample 906-1-1 #1	G. ruber	250-355	10	18.339	18.453	11.4
	sample 906-1-1 #2	G. ruber	250-355	10	18.341	18.463	12.2
	sample 906-1-1 #3	G. ruber	250-355	10	18.343	18.448	10.5
	sample 906-1-1 #4	G. ruber	250-355	10	18.344	18.448	10.4
	sample 906-1-1 #5	G. ruber	250-355	10	18.344	18.469	12.5
	sample 906-1-1 #6	G. ruber	250-355	10	18.344	18.46	11.6
	average				18.3425		11.4333
	s.d.				0.00207364		0.859457
	S.E.				0.000846562		0.350872
	95% conf. Interval on mean lower limit				18.3408		10.7456
	95% conf. Interval on mean upper limit				18.3442		12.121

## Sheet: Sediment_Trap_Data
Original data from:
Conan, S.M.-H.: Calibration of planktic foraminifera proxies for paleoproductivity and seasonal variability in the western Arabian Sea, Faculty of Earth and Life Sciences, Vrije Universiteit, Amsterdam, 225 pp., 2006.
"season"	SAMPLE	SIZE FRACTION	SPECIES	# SPECIMENS weighed	TOTAL WEIGHT (ug)	MASS PER INDIVIDUAL (mg)	cup	d13C ruber	d18Oruber	flux (#.m-2.day^-1)	days	flux	flux*weight	flux.weight^2	NON-FLUX WEIGHTED	mean mass (N.F.W.)	stdev mass ()N.F.W.)	N	s.e. Mass (N.F.W.)	95%_C.I._MEAN_mass (N.F.W.)	95%_c.i._mean_LL_mass (N.F.W.)	95%_c.i._mean_UL_mass (N.F.W.)	mean d13C (N.F.W.)	stdev d13C ()N.F.W.)	s.e. d13C (N.F.W.)	95%_C.I._MEAN_d13C (N.F.W.)	95%_c.i._mean_LL_d13C (N.F.W.)	95%_c.i._mean_UL_d13C (N.F.W.)	mean d18O (N.F.W.)	stdev d18O ()N.F.W.)	s.e. d18O (N.F.W.)	95%_C.I._MEAN_d18O (N.F.W.)	95%_c.i._mean_LL_d18O (N.F.W.)	95%_c.i._mean_UL_d18O (N.F.W.)	FLUX WEIGHTED	mean mass (F.W.)	stdev mass ()F.W.)	N	s.e. Mass (F.W.)	95%_C.I._MEAN_mass (F.W.)	95%_c.i._mean_LL_mass (F.W.)	95%_c.i._mean_UL_mass (F.W.)
"upwelling-season"	MST8-B2	250-355	G. ruber	14	0.166	11.8571	2	0.785	-2.203	146.76	14	2054.64	24362.2	288866	upwelling	10.8379	0.888801	11	0.267984	0.525248	10.3126	11.3631	0.625227	0.133123	0.0401381	0.0786707	0.546557	0.703898	-1.69907	0.23439	0.0706712	0.138516	-1.83759	-1.56056	upwelling	11.1156	0.649953	12	0.187625	0.367746	10.7478	11.4833
"upwelling-season"	MST8-B3	250-355	G. ruber	12	0.125	10.4167	3	0.622	-1.705	63.39	14	887.46	9244.38	96295.6	non-upwelling	12.4271	1.13658	8	0.40184	0.787607	11.6395	13.2147	1.03875	0.175231	0.0619535	0.121429	0.917321	1.16018	-2.15222	0.114689	0.0405486	0.0794752	-2.23169	-2.07274	non-upwelling	12.5248	1.07681	7	0.406996	0.797713	11.7271	13.3225
"upwelling-season"	MST8-B4	250-355	G. ruber	12	0.131	10.9167	4	0.533	-1.6	59.79	14	837.06	9137.9	99755.5	total trap series	11.507	1.26138	19	0.289381	0.567186	10.9398	12.0742	0.799342	0.25649	0.0588427	0.115332	0.68401	0.914674	-1.88987	0.297443	0.0682382	0.133747	-2.02362	-1.75612	total trap series	11.7824	1.12527	19	0.258155	0.505984	11.2764	12.2884
"upwelling-season"	MST8-B5	250-355	G. ruber	9	0.081	9	5	0.407	-1.534	19.43	14	272.02	2448.18	22033.6
"upwelling-season"	MST8-B6	250-355	G. ruber	11	0.123	11.1818	6	0.538	-1.4151	27.51	14	385.14	4306.57	48155.2
"upwelling-season"	MST8-B7	250-355	G. ruber	14	0.163	11.6429	7	0.6	-1.691	208.31	14	2916.34	33954.5	395328
"upwelling-season"	MST8-B8	250-355	G. ruber	13	0.142	10.9231	8	0.6475	-1.457	457.19	7	3200.33	34957.5	381843
"upwelling-season"	MST8-B9	250-355	G. ruber	14	0.146	10.4286	9	0.485	-1.5387	299.22	7	2094.54	21843.1	227792
"upwelling-season"	MST8-B10	250-355	G. ruber	15	0.169	11.2667	10	0.841	-1.717	200.7	14	2809.8	31657.1	356670
"upwelling-season"	MST8-B11	250-355	G. ruber	12	0.142	11.8333	11	0.766	-1.924	137.04	14	1918.56	22703	268652
"upwelling-season"	MST8-B12	250-355	G. ruber	12	0.117	9.75	12	0.653	-1.905	76.94	14	1077.16	10502.3	102398
"upwelling-season"	MST8-B13	250-355	G. ruber	12	0.14	11.6667	13	0.916	-2.1684	37.04	14	518.56	6049.87	70581.8
"non-upwelling-season"	MST8-B14	250-355	G. ruber	12	0.142	11.8333	14	1.214	-2.248	71	14	994	11762.3	139188
"non-upwelling-season"	MST8-B15	250-355	G. ruber	12	0.176	14.6667	15	1.211	-2.313	160.78	14	2250.92	33013.5	484198
"non-upwelling-season"	MST8-B16	250-355	G. ruber	12	0.163	13.5833	16	1.18	-2.188	172.06	14	2408.84	32720.1	444448
"non-upwelling-season"	MST8-B17	250-355	G. ruber	12	0.146	12.1667	17	1.072	-2.211	191.65	14	2683.1	32644.4	397173
"non-upwelling-season"	MST8-B18	250-355	G. ruber	21	0.262	12.4762	18	1.106	-2.059	167.39	14	2343.46	29237.5	364772
"non-upwelling-season"	MST8-B19	250-355	G. ruber	14	0.16	11.4286	19	0.856	-2.069	71.9	14	1006.6	11504	131474
"non-upwelling-season"	MST8-B20	250-355	G. ruber	84	0.974	11.5952	20	0.755	-1.96133	312	14	4368	50648	587276
column sum upwelling											140	18453	205117	2.28779e+06
column sum non upwelling											112	16573.5	207580	2.61911e+06
column sum total time series											252	35026.5	412696	4.9069e+06
